# Supplementary material for: Elevated Levels of the Anti-Inflammatory Interleukin-1 Receptor Antagonist Precede the Onset of Type 2 Diabetes
Source: Oxford University Press journal article supplement (doi:10.2337/dc08-1161), 2008-12-11
Supplement: -_dc08-1161_online_appendix.doc [file -_dc08-1161_online_appendix.doc]

##### Online-Only Appendix

**RESEARCH DESIGN AND METHODS**

We present results from a nested case-control study within the Whitehall II cohort, which was established in 1985 and included 10,308 civil servants aged 35-55 years (1). Study phase 3 (1991-1994) was the first phase where glucose tolerance was assessed by a 75g oral glucose tolerance test (OGTT) and is the baseline for the current study (n=7537). Participants were followed through postal questionnaires at 2.5-year intervals (phases 4-8) and further clinical examinations (including an OGTT) in 1997-1999 (phase 5) and 2003-2004 (phase 7) (2). The study was approved by the University College London Medical School Committee on the Ethics of Human Research. Informed consent was obtained at baseline and renewed at each contact.

Individuals without type 2 diabetes at baseline and with incident type 2 diabetes during the follow-up period of 11.53.0 years served as cases (n=181). Diagnosis of type 2 diabetes was based on the results of a 75g OGTT (56.8%), antidiabetic drug treatment (25.4%) or self-report of physician-diagnosed diabetes (17.8%). Autoantibody measurements were not performed so that we cannot exclude that some cases who were classified as type 2 diabetes were actually cases with latent autoimmune diabetes in adults (LADA), which is a limitation of our study. Controls (n=376) with normal glucose tolerance (NGT) at baseline and during follow-up were frequency-matched to cases for age (5-year bands), sex and BMI (5-kg/m² bands). Persons with prevalent or incident coronary heart disease (if occurring before diabetes diagnosis), self-reported longstanding inflammatory illness at baseline (multiple sclerosis, inflammatory bowel disease, chronic bronchitis, rheumatoid arthritis and other connective tissue diseases), recent inflammatory symptoms (sore throat, catarrh, phlegm, cough or toothache/gum problems within 14 days before examination), anti-inflammatory medication and non-white ethnicity were excluded.

Anthropometric, metabolic and socioeconomic variables were determined as described before (2). CRP and IL-6 were measured using high-sensitivity immunonephelometric and ELISA assays, respectively. IL-1Ra serum concentrations were measured with the Quantikine ELISA kit (R&D Systems, Wiesbaden, Germany). Mean intra- and inter-assay CVs were 3.9% and 10.9%, respectively. The limit of detection was 14 pg/ml.

Logistic regression was used to assess the association between IL-1Ra levels, possible covariates and incident type 2 diabetes. Results are given as odds ratios (ORs) and corresponding 95% confidence intervals (95%CIs). For all statistical analyses *P*<0.05 was considered to be statistically significant. **Analyses were conducted using SAS (Version 9.1, SAS Institute, Cary, NC).**

**References:**

(1) Marmot M, Brunner E. Cohort profile: the Whitehall II study. *Int J Epidemiol* 34:251-256, 2005

(2) Kumari M, Head J, Marmot M: Prospective study of social and other risk factors for incidence of type 2 diabetes in the Whitehall II study. *Arch Intern Med* 164:1873-1880, 2004

##### Table A1 – Baseline characteristics of study participants stratified by case-control status

| **Variable** | Controls (*N* = 376) | Cases (*N* = 181) | P |
| --- | --- | --- | --- |
| Age (years) | 50.6  6.35 | 51.2  5.96 | 0.298 |
| Sex (m/f) (%) | 72.9/27.1 | 71.3/28.7 | 0.687 |
| BMI (kg/m²) | 26.3  3.83 | 27.3  4.53 | **0.021** |
| Waist circumference (men) (cm)* | 89.9  9.65 | 92.3  10.36 | **0.024** |
| Waist circumference (women) (cm) † | 78.1  11.48 | 83.6  16.01 | **0.033** |
| Systolic blood pressure (mmHg) | 120.9  12.63 | 125.9  14.94 | **0.0002** |
| Diastolic blood pressure (mmHg) | 80.5  9.28 | 82.9  10.56 | **0.008** |
| Total cholesterol (mmol/l) | 6.58  1.18 | 6.70  1.17 | 0.267 |
| Fasting triglycerides (mmol/l) | 1.19 (0.86; 1.79) | 1.63 (1.14; 2.31) | **<0.0001** |
| Fasting glucose (mmol/l) | 5.05  0.37 | 5.44  0.56 | **<0.0001** |
| 2-hr glucose (mmol/l) | 5.05  1.17 | 6.58  1.90 | **<0.0001** |
| Fasting insulin (mU/l) ‡ | 5.2 (3.3; 7.8) | 7.9 (5.3; 12.0) | **<0.0001** |
| HOMA-IR ‡ | 1.18 (0.74; 1.8) | 1.92 (1.27; 2.96) | **<0.0001** |
| IL-1Ra (pg/ml) | 207.6 (159.3; 274.8) | 232.8 (180.7; 342.2) | **0.0006** |
| CRP (mg/l) | 0.86 (0.48; 1.59) | 1.13 (0.57; 1.42) | **0.005** |
| IL-6 (pg/ml) | 1.41 (1.05; 1.99) | 1.56 (1.18; 2.10) | 0.078 |
| Employment grade (%) § | 18.2/23.9/15.2/ 16.6/13.3/12.8 | 16.2/18.0/15.6/ 17.4/10.2/22.8 | 0.068 |
| Smoking status (%) ║ | 53.1/35.7/11.2 | 51.5/37.6/10.9 | 0.908 |
| Physical activity (%) ¶ | 33.2/50.5/16.3 | 36.9/45.8/17.3 | 0.591 |
| Antihypertensive medication (%) | 6.4 | 11.6 | **0.045** |
| Lipid-lowering medication (%) | 0.3 | 1.1 | 0.248 |

Data with normal and non-normal distribution are given as mean  standard deviation and median (25th percentile; 75th percentile), respectively. Groups were compared using chi-square test, Fisher's exact test, two-sample and Wilcoxon two-sample test as appropriate. * *N* = 398; † *N* = 153; ‡ *N* = 476; § employment grade is coded in 6 classes running from 1 (highest grade) to 6 (lowest grade); ║ smoking is coded in 3 classes (never smoked, former smoker, current smoker); ¶ physical activity is coded in 3 classes (none/mild, moderate, vigorous).
